# Supplementary material
Source: HighWire-hosted journal article supplement (https://www.pnas.org/content/suppl/2002/09/05/182234399)
Supplement: 2343Table3.pdf [file 2343Table3.pdf]

Supporting information for Roth *et al.* (2002) *Proc. Natl. Acad. Sci. USA*,  
10.1073/pnas.182234399

**Table 3.  $\kappa$  opiate receptor residues acting as hydrogen bond donors to bound salvinorin**

| Receptor segment | 6 residue | Corresponding *, : | Salvinorin fragment |
|------------------|-----------|--------------------|---------------------|
| TM2              | Q115      | Q, Q               | Furan oxygen        |
| TM3              | Y139      | Y, Y               | Lactone carbonyl    |
| TM7              | Y312      | L, W               | 2-acetoxy           |
| TM7              | Y313      | H, H               | 4-methoxycarbonyl   |
